# Supplementary material for: Increasing Resistance and Changes in Distribution of Serotypes of Streptococcus agalactiae in Poland
Source: PubMed Central journal article supplement (PMC7400139; doi:10.3390/pathogens9070526), 2020-06-29
Supplement: pathogens-09-00526-s001.pdf [file pathogens-09-00526-s001.pdf]

Supplementary Table S1. Antimicrobial susceptibility testing results obtained by disc diffusion method and antimicrobial gradient diffusion method (E-test).

|                                              | E-test      | Disc diffusion method |   |            |   |              |   |             |   |            |   |            |   | Resistance mechanisms |
|----------------------------------------------|-------------|-----------------------|---|------------|---|--------------|---|-------------|---|------------|---|------------|---|-----------------------|
|                                              | Penicilin G | P* (1IU)              |   | TE* (30µg) |   | TGC* (15 µg) |   | LEV* (5 µg) |   | E* (15 µg) |   | DA* (2 µg) |   |                       |
| Strains derived from pregnant women (n = 85) |             |                       |   |            |   |              |   |             |   |            |   |            |   |                       |
| 1                                            | 0.094       | 22                    | S | 10         | R | 20           | S | 19          | S | 26         | S | 23         | S | -                     |
| 3                                            | 0.094       | 22                    | S | 8          | R | 19           | S | 19          | S | 6          | R | 6          | R | MLS <sub>B</sub> c    |
| 4                                            | 0.064       | 25                    | S | 8          | R | 20           | S | 20          | S | 27         | S | 25         | S | -                     |
| 7                                            | 0.094       | 21                    | S | 9          | R | 19           | S | 19          | S | 25         | S | 22         | S | -                     |
| 8                                            | 0.094       | 22                    | S | 13         | R | 21           | S | 23          | S | 24         | S | 22         | S | -                     |
| 9                                            | 0.094       | 23                    | S | 8          | R | 19           | S | 20          | S | 25         | S | 22         | S | -                     |
| 10                                           | 0.064       | 22                    | S | 11         | R | 22           | S | 23          | S | 28         | S | 22         | S | -                     |
| 11                                           | 0.125       | 23                    | S | 8          | R | 20           | S | 20          | S | 27         | S | 24         | S | -                     |
| 12                                           | 0.064       | 23                    | S | 14         | R | 19           | S | 20          | S | 24         | S | 21         | S | -                     |
| 13                                           | 0.094       | 24                    | S | 8          | R | 19           | S | 20          | S | 12         | R | 19         | R | MLS <sub>B</sub> i    |
| 14                                           | 0.064       | 23                    | S | 8          | R | 20           | S | 19          | S | 6          | R | 6          | R | MLS <sub>B</sub> c    |
| 17                                           | 0.094       | 21                    | S | 8          | R | 21           | S | 20          | S | 25         | S | 22         | S | -                     |
| 19                                           | 0.064       | 22                    | S | 8          | R | 19           | S | 19          | S | 25         | S | 23         | S | -                     |
| 20                                           | 0.094       | 23                    | S | 12         | R | 21           | S | 21          | S | 28         | S | 24         | S | -                     |
| 21                                           | 0.064       | 25                    | S | 26         | S | 21           | S | 22          | S | 26         | S | 22         | S | -                     |
| 22                                           | 0.094       | 23                    | S | 8          | R | 19           | S | 19          | S | 13         | R | 12         | R | MLS <sub>B</sub> c    |
| 23                                           | 0.032       | 25                    | S | 8          | R | 21           | S | 24          | S | 28         | S | 25         | S | -                     |
| 24                                           | 0.064       | 23                    | S | 10         | R | 22           | S | 20          | S | 26         | S | 25         | S | -                     |
| 27                                           | 0.094       | 24                    | S | 8          | R | 19           | S | 19          | S | 6          | R | 6          | R | MLS <sub>B</sub> c    |
| 30                                           | 0.125       | 25                    | S | 15         | R | 21           | S | 24          | S | 24         | S | 22         | S | -                     |
| 31                                           | 0.094       | 23                    | S | 8          | R | 19           | S | 20          | S | 25         | S | 22         | S | -                     |
| 35                                           | 0.064       | 22                    | S | 10         | R | 20           | S | 20          | S | 25         | S | 22         | S | -                     |
| 36                                           | 0.094       | 24                    | S | 15         | R | 21           | S | 20          | S | 6          | R | 6          | R | MLS <sub>B</sub> c    |
| 40                                           | 0.094       | 23                    | S | 10         | R | 19           | S | 21          | S | 25         | S | 22         | S | -                     |
| 41                                           | 0.064       | 24                    | S | 12         | R | 21           | S | 20          | S | 26         | S | 23         | S | -                     |
| 42                                           | 0.094       | 24                    | S | 13         | R | 20           | S | 20          | S | 26         | S | 22         | S | -                     |
| 43                                           | 0.094       | 22                    | S | 10         | R | 19           | S | 19          | S | 24         | S | 21         | S | -                     |
| 44                                           | 0.064       | 22                    | S | 8          | R | 20           | S | 19          | S | 25         | S | 21         | S | -                     |
| 45                                           | 0.094       | 22                    | S | 8          | R | 19           | S | 19          | S | 23         | S | 22         | S | -                     |
| 46                                           | 0.032       | 26                    | S | 23         | S | 21           | S | 20          | S | 27         | S | 24         | S | -                     |
| 49                                           | 0.064       | 23                    | S | 10         | R | 22           | S | 20          | S | 12         | R | 6          | R | MLS <sub>B</sub> c    |
| 51                                           | 0.094       | 21                    | S | 10         | R | 19           | S | 20          | S | 25         | S | 22         | S | -                     |
| 53                                           | 0.094       | 22                    | S | 12         | R | 20           | S | 19          | S | 25         | S | 23         | S | -                     |
| 54                                           | 0.064       | 23                    | S | 10         | R | 19           | S | 20          | S | 6          | R | 6          | R | MLS <sub>B</sub> c    |
| 57                                           | 0.047       | 25                    | S | 11         | R | 19           | S | 18          | S | 25         | S | 21         | S | -                     |
| 59                                           | 0.094       | 23                    | S | 9          | R | 19           | S | 20          | S | 23         | S | 21         | S | -                     |
| 60                                           | 0.094       | 22                    | S | 10         | R | 20           | S | 19          | S | 26         | S | 23         | S | -                     |
| 61                                           | 0.094       | 23                    | S | 17         | R | 24           | S | 24          | S | 8          | R | 19         | R | MLS <sub>B</sub> i    |

|     |       |    |   |    |   |    |   |    |   |    |   |    |   |                    |
|-----|-------|----|---|----|---|----|---|----|---|----|---|----|---|--------------------|
| 62  | 0.047 | 22 | S | 20 | R | 19 | S | 20 | S | 25 | S | 22 | S | -                  |
| 64  | 0.125 | 21 | S | 12 | R | 21 | S | 21 | S | 25 | S | 22 | S | -                  |
| 65  | 0.094 | 21 | S | 12 | R | 19 | S | 20 | S | 25 | S | 22 | S | -                  |
| 66  | 0.125 | 22 | S | 13 | R | 19 | S | 21 | S | 25 | S | 23 | S | -                  |
| 67  | 0.064 | 25 | S | 10 | R | 20 | S | 19 | S | 26 | S | 22 | S | -                  |
| 68  | 0.094 | 23 | S | 18 | R | 24 | S | 22 | S | 30 | S | 25 | S | -                  |
| 69  | 0.094 | 26 | S | 14 | R | 20 | S | 22 | S | 28 | S | 24 | S | -                  |
| 70  | 0.094 | 23 | S | 8  | R | 20 | S | 20 | S | 26 | S | 23 | S | -                  |
| 71  | 0.125 | 22 | S | 10 | R | 19 | S | 20 | S | 26 | S | 23 | S | -                  |
| 72  | 0.047 | 22 | S | 8  | R | 19 | S | 20 | S | 17 | R | 20 | R | MLS <sub>B</sub> i |
| 75  | 0.064 | 26 | S | 26 | S | 22 | S | 23 | S | 27 | S | 22 | S | -                  |
| 78  | 0.064 | 30 | S | 12 | R | 21 | S | 24 | S | 6  | R | 6  | R | MLS <sub>B</sub> c |
| 80  | 0.094 | 24 | S | 10 | R | 19 | S | 19 | S | 6  | R | 6  | R | MLS <sub>B</sub> c |
| 81  | 0.047 | 22 | S | 10 | R | 19 | S | 20 | S | 26 | S | 23 | S | -                  |
| 82  | 0.064 | 25 | S | 10 | R | 22 | S | 22 | S | 28 | S | 26 | S | -                  |
| 83  | 0.094 | 23 | S | 9  | R | 19 | S | 19 | S | 25 | S | 21 | S | -                  |
| 86  | 0.125 | 22 | S | 17 | R | 21 | S | 19 | S | 24 | S | 21 | S | -                  |
| 88  | 0.094 | 18 | S | 12 | R | 20 | S | 22 | S | 26 | S | 23 | S | -                  |
| 90  | 0.094 | 23 | S | 10 | R | 19 | S | 21 | S | 25 | S | 22 | S | -                  |
| 91  | 0.094 | 22 | S | 20 | R | 19 | S | 20 | S | 25 | S | 22 | S | -                  |
| 94  | 0.064 | 23 | S | 10 | R | 19 | S | 20 | S | 26 | S | 23 | S | -                  |
| 96  | 0.064 | 24 | S | 10 | R | 19 | S | 21 | S | 14 | R | 6  | R | MLS <sub>B</sub> c |
| 98  | 0.047 | 27 | S | 14 | R | 21 | S | 24 | S | 27 | S | 24 | S | -                  |
| 99  | 0.094 | 25 | S | 29 | S | 20 | S | 21 | S | 28 | S | 19 | S | -                  |
| 106 | 0.094 | 26 | S | 13 | R | 20 | S | 21 | S | 26 | S | 23 | S | -                  |
| 107 | 0.064 | 26 | S | 14 | R | 21 | S | 21 | S | 10 | R | 23 | S | M                  |
| 111 | 0.064 | 26 | S | 15 | R | 22 | S | 24 | S | 25 | S | 24 | S | -                  |
| 112 | 0.064 | 22 | S | 14 | R | 21 | S | 24 | S | 16 | R | 19 | R | MLS <sub>B</sub> i |
| 113 | 0.064 | 28 | S | 14 | R | 22 | S | 24 | S | 29 | S | 24 | S | -                  |
| 114 | 0.094 | 23 | S | 14 | R | 20 | S | 21 | S | 25 | S | 22 | S | -                  |
| 115 | 0.064 | 25 | S | 25 | S | 21 | S | 22 | S | 25 | S | 22 | S | -                  |
| 117 | 0.064 | 25 | S | 18 | R | 22 | S | 25 | S | 6  | R | 6  | R | MLS <sub>B</sub> c |
| 118 | 0.094 | 27 | S | 23 | S | 22 | S | 24 | S | 27 | S | 24 | S | -                  |
| 119 | 0.094 | 24 | S | 14 | R | 21 | S | 21 | S | 28 | S | 25 | S | -                  |
| 121 | 0.125 | 23 | S | 12 | R | 20 | S | 20 | S | 25 | S | 23 | S | -                  |
| 122 | 0.094 | 27 | S | 15 | R | 24 | S | 25 | S | 14 | R | 21 | R | MLS <sub>B</sub> i |
| 123 | 0.064 | 28 | S | 14 | R | 21 | S | 22 | S | 15 | R | 22 | R | MLS <sub>B</sub> i |
| 124 | 0.032 | 26 | S | 13 | R | 22 | S | 25 | S | 6  | R | 6  | R | MLS <sub>B</sub> c |
| 125 | 0.094 | 25 | S | 14 | R | 21 | S | 22 | S | 20 | S | 23 | S | -                  |
| 127 | 0.064 | 30 | S | 17 | R | 22 | S | 21 | S | 6  | R | 6  | R | MLS <sub>B</sub> c |
| 128 | 0.094 | 25 | S | 18 | R | 20 | S | 22 | S | 25 | S | 17 | S | -                  |
| 129 | 0.094 | 25 | S | 28 | S | 22 | S | 22 | S | 28 | S | 24 | S | -                  |
| 130 | 0.064 | 27 | S | 12 | R | 21 | S | 23 | S | 28 | S | 25 | S | -                  |
| 131 | 0.064 | 26 | S | 13 | R | 22 | S | 22 | S | 28 | S | 24 | S | -                  |
| 138 | 0.047 | 28 | S | 16 | R | 20 | S | 24 | S | 28 | S | 25 | S | -                  |

|                                            |       |    |   |    |   |    |   |    |   |    |   |    |   |                    |
|--------------------------------------------|-------|----|---|----|---|----|---|----|---|----|---|----|---|--------------------|
| 141                                        | 0.094 | 28 | S | 18 | R | 23 | S | 25 | S | 17 | R | 25 | S | M                  |
| 146                                        | 0.094 | 25 | S | 11 | R | 19 | S | 22 | S | 6  | R | 6  | R | MLS <sub>B</sub> c |
| Strains derived from other adults (n = 44) |       |    |   |    |   |    |   |    |   |    |   |    |   |                    |
| 50                                         | 0.094 | 25 | S | 14 | R | 20 | S | 26 | S | 27 | S | 25 | S | -                  |
| 63                                         | 0.064 | 27 | S | 19 | R | 22 | S | 24 | S | 21 | S | 19 | S | -                  |
| 76                                         | 0.032 | 28 | S | 17 | R | 23 | S | 25 | S | 28 | S | 27 | S | -                  |
| 93                                         | 0.064 | 26 | S | 13 | R | 22 | S | 19 | S | 27 | S | 25 | S | -                  |
| 97                                         | 0.064 | 27 | S | 16 | R | 22 | S | 23 | S | 30 | S | 25 | S | -                  |
| 100                                        | 0.094 | 25 | S | 13 | R | 22 | S | 23 | S | 15 | R | 22 | R | MLS <sub>B</sub> i |
| 101                                        | 0.094 | 25 | S | 11 | R | 21 | S | 23 | S | 26 | S | 25 | S | -                  |
| 105                                        | 0.047 | 31 | S | 17 | R | 23 | S | 22 | S | 28 | S | 24 | S | -                  |
| 116                                        | 0.094 | 25 | S | 15 | R | 21 | S | 24 | S | 25 | S | 23 | S | -                  |
| 142                                        | 0.064 | 26 | S | 25 | S | 21 | S | 23 | S | 26 | S | 24 | S | -                  |
| 148                                        | 0.125 | 23 | S | 13 | R | 22 | S | 20 | S | 24 | S | 22 | S | -                  |
| 149                                        | 0.047 | 27 | S | 17 | R | 20 | S | 20 | S | 27 | S | 22 | S | -                  |
| 153                                        | 0.125 | 23 | S | 17 | R | 20 | S | 21 | S | 25 | S | 24 | S | -                  |
| 154                                        | 0.064 | 25 | S | 15 | R | 22 | S | 22 | S | 27 | S | 24 | S | -                  |
| 157                                        | 0.047 | 24 | S | 13 | R | 20 | S | 21 | S | 14 | R | 21 | R | MLS <sub>B</sub> i |
| 159                                        | 0.047 | 28 | S | 12 | R | 22 | S | 24 | S | 6  | R | 6  | R | MLS <sub>B</sub> c |
| 163                                        | 0.094 | 28 | S | 13 | R | 19 | S | 21 | S | 6  | R | 6  | R | MLS <sub>B</sub> c |
| 165                                        | 0.064 | 26 | S | 26 | S | 24 | S | 22 | S | 28 | S | 25 | S | -                  |
| 168                                        | 0.094 | 25 | S | 11 | R | 20 | S | 21 | S | 14 | R | 13 | R | MLS <sub>B</sub> c |
| 170                                        | 0,064 | 24 | S | 12 | R | 21 | S | 21 | S | 6  | R | 6  | R | MLS <sub>B</sub> c |
| 171                                        | 0.064 | 26 | S | 14 | R | 21 | S | 24 | S | 26 | S | 23 | S | -                  |
| 172                                        | 0.064 | 27 | S | 13 | R | 27 | S | 24 | S | 6  | R | 6  | R | MLS <sub>B</sub> c |
| 173                                        | 0.094 | 26 | S | 14 | R | 21 | S | 22 | S | 28 | S | 25 | S | -                  |
| 174                                        | 0.094 | 24 | S | 14 | R | 21 | S | 25 | S | 27 | S | 24 | S | -                  |
| 175                                        | 0.064 | 26 | S | 12 | R | 21 | S | 23 | S | 6  | R | 6  | R | MLS <sub>B</sub> c |
| 177                                        | 0.094 | 26 | S | 13 | R | 22 | S | 24 | S | 29 | S | 26 | S | -                  |
| 179                                        | 0.064 | 26 | S | 14 | R | 19 | S | 23 | S | 14 | R | 21 | R | MLS <sub>B</sub> i |
| 180                                        | 0.094 | 25 | S | 17 | R | 23 | S | 22 | S | 28 | S | 24 | S | -                  |
| 181                                        | 0.064 | 25 | S | 15 | R | 21 | S | 24 | S | 26 | S | 24 | S | -                  |
| 182                                        | 0.047 | 29 | S | 16 | R | 20 | S | 23 | S | 24 | S | 22 | S | -                  |
| 183                                        | 0.094 | 26 | S | 17 | R | 22 | S | 24 | S | 17 | R | 23 | S | M                  |
| 184                                        | 0.032 | 26 | S | 16 | R | 25 | S | 23 | S | 26 | S | 23 | S | -                  |
| 185                                        | 0.064 | 26 | S | 17 | R | 24 | S | 23 | S | 29 | S | 24 | S | -                  |
| 186                                        | 0.047 | 26 | S | 13 | R | 21 | S | 21 | S | 26 | S | 24 | S | -                  |
| 188                                        | 0.064 | 27 | S | 16 | R | 21 | S | 22 | S | 28 | S | 25 | S | -                  |
| 189                                        | 0.094 | 25 | S | 17 | R | 21 | S | 23 | S | 28 | S | 24 | S | -                  |
| 18                                         | 0.064 | 27 | S | 25 | S | 22 | S | 21 | S | 28 | S | 23 | S | -                  |
| 58                                         | 0.125 | 24 | S | 18 | R | 21 | S | 22 | S | 16 | R | 6  | R | MLS <sub>B</sub> c |
| 77                                         | 0.064 | 26 | S | 12 | R | 21 | S | 22 | S | 6  | R | 6  | R | MLS <sub>B</sub> c |
| 133                                        | 0.047 | 29 | S | 16 | R | 24 | S | 23 | S | 29 | S | 25 | S | -                  |
| 143                                        | 0.064 | 26 | S | 17 | R | 27 | S | 24 | S | 16 | R | 26 | S | M                  |
| 147                                        | 0.064 | 25 | S | 14 | R | 21 | S | 23 | W | 14 | R | 21 | R | MLS <sub>B</sub> i |

|                                       |       |    |   |    |   |    |   |    |   |    |   |    |   |                    |
|---------------------------------------|-------|----|---|----|---|----|---|----|---|----|---|----|---|--------------------|
| 161                                   | 0.064 | 27 | S | 19 | R | 22 | S | 26 | S | 31 | S | 25 | S | -                  |
| 164                                   | 0.094 | 25 | S | 15 | R | 22 | S | 26 | S | 26 | S | 24 | S | -                  |
| Strains derived from newborn (n = 36) |       |    |   |    |   |    |   |    |   |    |   |    |   |                    |
| 2                                     | 0.094 | 25 | S | 14 | R | 21 | S | 20 | S | 26 | S | 22 | S | -                  |
| 5                                     | 0.064 | 25 | S | 13 | R | 22 | S | 23 | S | 17 | R | 21 | R | MLS <sub>B</sub> c |
| 16                                    | 0.125 | 25 | S | 15 | R | 22 | S | 22 | S | 15 | R | 24 | S | M                  |
| 25                                    | 0.047 | 29 | S | 16 | R | 22 | S | 24 | S | 30 | S | 26 | S | -                  |
| 26                                    | 0.094 | 25 | S | 18 | R | 25 | S | 24 | S | 28 | S | 24 | S | -                  |
| 28                                    | 0.064 | 26 | S | 18 | R | 21 | S | 24 | S | 29 | S | 24 | S | -                  |
| 34                                    | 0.094 | 24 | S | 16 | R | 20 | S | 21 | S | 25 | S | 22 | S | -                  |
| 38                                    | 0.125 | 22 | S | 8  | R | 19 | S | 20 | S | 25 | S | 22 | S | -                  |
| 55                                    | 0.064 | 25 | S | 16 | R | 21 | S | 23 | S | 25 | S | 24 | S | -                  |
| 56                                    | 0.047 | 22 | S | 15 | R | 19 | S | 20 | S | 21 | S | 22 | S | -                  |
| 79                                    | 0.064 | 26 | S | 13 | R | 22 | S | 21 | S | 22 | S | 25 | S | -                  |
| 85                                    | 0.064 | 26 | S | 14 | R | 22 | S | 20 | S | 12 | R | 6  | R | MLS <sub>B</sub> c |
| 89                                    | 0.094 | 25 | S | 13 | R | 21 | S | 20 | S | 24 | S | 23 | S | -                  |
| 95                                    | 0.094 | 25 | S | 16 | R | 19 | S | 19 | S | 16 | R | 20 | R | MLS <sub>B</sub> i |
| 102                                   | 0.064 | 25 | S | 27 | S | 25 | S | 25 | S | 28 | S | 25 | S | -                  |
| 120                                   | 0.094 | 24 | S | 13 | R | 20 | S | 20 | S | 6  | R | 6  | R | MLS <sub>B</sub> c |
| 134                                   | 0.047 | 26 | S | 15 | R | 22 | S | 26 | S | 21 | S | 19 | S | -                  |
| 135                                   | 0.064 | 25 | S | 16 | R | 20 | S | 21 | S | 27 | S | 24 | S | -                  |
| 136                                   | 0.032 | 27 | S | 14 | R | 23 | S | 25 | S | 18 | I | 27 | S | -                  |
| 137                                   | 0.094 | 24 | S | 14 | R | 22 | S | 25 | S | 16 | R | 26 | S | M                  |
| 139                                   | 0.064 | 25 | S | 13 | R | 22 | S | 24 | S | 21 | S | 25 | S | -                  |
| 140                                   | 0.125 | 25 | S | 16 | R | 22 | S | 24 | S | 12 | R | 25 | S | M                  |
| 145                                   | 0.047 | 27 | S | 20 | R | 25 | S | 27 | S | 28 | S | 24 | S | -                  |
| 151                                   | 0.064 | 24 | S | 17 | R | 21 | S | 23 | S | 16 | R | 20 | S | M                  |
| 152                                   | 0.064 | 25 | S | 13 | R | 22 | S | 21 | S | 6  | R | 6  | R | MLS <sub>B</sub> c |
| 155                                   | 0.047 | 24 | S | 16 | R | 19 | S | 22 | S | 25 | S | 22 | S | -                  |
| 156                                   | 0.064 | 25 | S | 12 | R | 21 | S | 23 | S | 27 | S | 24 | S | -                  |
| 160                                   | 0.094 | 26 | S | 13 | R | 20 | S | 19 | S | 28 | S | 24 | S | -                  |
| 167                                   | 0.047 | 23 | S | 15 | R | 20 | S | 21 | S | 24 | S | 21 | S | -                  |
| 187                                   | 0.125 | 23 | S | 12 | R | 19 | S | 20 | S | 6  | R | 6  | R | MLS <sub>B</sub> c |
| 15                                    | 0.094 | 25 | S | 27 | S | 24 | S | 23 | S | 29 | S | 23 | S | -                  |
| 33                                    | 0.064 | 25 | S | 14 | R | 20 | S | 21 | S | 6  | R | 6  | R | MLS <sub>B</sub> c |
| 39                                    | 0.064 | 25 | S | 16 | R | 22 | S | 24 | S | 28 | S | 26 | S | -                  |
| 84                                    | 0.047 | 27 | S | 14 | R | 23 | S | 20 | S | 10 | R | 6  | R | MLS <sub>B</sub> c |
| 144                                   | 0.094 | 25 | S | 13 | R | 22 | S | 23 | S | 17 | R | 25 | S | M                  |
| 162                                   | 0.064 | 26 | S | 13 | R | 19 | S | 23 | S | 6  | R | 6  | R | MLS <sub>B</sub> c |

P (1IU) - penicilin; TE (30 µg) - tetracycline; TGC (15 µg) - tigecycline; LEV (5 µg) - levofloxacin; E (15 µg) - erythromycin; DA (2 µg) – clindamycin; MLS<sub>B</sub> c - constitutive mechanism of resistance to macrolides, lincosamides and streptogramin B; MLS<sub>B</sub> i - inductive mechanism of resistance to macrolides, lincosamides and streptogramin B; M - M phenotype; (-) - no resistance mechanism;

\*Diameter of the inhibition zone [mm] and interpretation of the results of susceptibility testing (accordance with the EUCAST and KORDL recommendations [61, 62]). S - susceptible ; R –resistant.

Supplementary Table S2. Results of serotyping and detection of virulence factors performed in the assessed strains

| Serotype                                            |           | The presence of genes encoding fimbriae |                |           |          | The presence of genes encoding surface proteins |            |               |            |               | Ability to form biofilm |           |          |
|-----------------------------------------------------|-----------|-----------------------------------------|----------------|-----------|----------|-------------------------------------------------|------------|---------------|------------|---------------|-------------------------|-----------|----------|
| n                                                   |           | PI-1<br>+PI-2a                          | PI-1<br>+PI-2b | PI-2a     | PI-2b    | <i>epsilon</i>                                  | <i>rib</i> | <i>alp2/3</i> | <i>bca</i> | <i>alp4**</i> | Weak                    | Moderate  | Strong   |
| <b>Strains derived from pregnant women (n = 85)</b> |           |                                         |                |           |          |                                                 |            |               |            |               |                         |           |          |
| <b>Ia</b>                                           | 15        | 0                                       | 0              | 15        | 0        | 12                                              | 3          | 0             | 0          | 0             | 6                       | 8         | 1        |
| <b>Ib</b>                                           | 7         | 4                                       | 1              | 1         | 1        | 3                                               | 1          | 3             | 0          | 0             | 1                       | 6         | 0        |
| <b>II</b>                                           | 9         | 8                                       | 1              | 0         | 0        | 0                                               | 5          | 1             | 3          | 0             | 3                       | 6         | 0        |
| <b>III</b>                                          | 31        | 14                                      | 15             | 2         | 0        | 2                                               | 23         | 6             | 0          | 0             | 14                      | 16        | 1        |
| <b>IV</b>                                           | 1         | 0                                       | 1              | 0         | 0        | 1                                               | 0          | 0             | 0          | 0             | 1                       | 0         | 0        |
| <b>V</b>                                            | 19        | 18                                      | 0              | 1         | 0        | 0                                               | 3          | 16            | 0          | 0             | 9                       | 10        | 0        |
| <b>VI</b>                                           | 3         | 3                                       | 0              | 0         | 0        | 0                                               | 2          | 1             | 0          | 0             | 1                       | 2         | 0        |
| <b>VII</b>                                          | 0         | 0                                       | 0              | 0         | 0        | 0                                               | 0          | 0             | 0          | 0             | 0                       | 0         | 0        |
| <b>Total</b>                                        | <b>85</b> | <b>47</b>                               | <b>18</b>      | <b>19</b> | <b>1</b> | <b>18</b>                                       | <b>37</b>  | <b>27</b>     | <b>3</b>   | <b>0</b>      | <b>35</b>               | <b>48</b> | <b>2</b> |
| <b>Strains derived from other adults (n = 44)</b>   |           |                                         |                |           |          |                                                 |            |               |            |               |                         |           |          |
| <b>Ia</b>                                           | 6         | 1                                       | 0              | 5         | 0        | 5                                               | 1          | 0             | 0          | 0             | 5                       | 1         | 0        |
| <b>Ib</b>                                           | 4         | 4                                       | 0              | 0         | 0        | 0                                               | 3          | 0             | 1          | 0             | 2                       | 2         | 0        |
| <b>II</b>                                           | 6         | 5                                       | 0              | 0         | 1        | 1                                               | 2          | 1             | 2          | 0             | 3                       | 2         | 1        |
| <b>III</b>                                          | 12        | 6                                       | 4              | 2         | 0        | 0                                               | 8          | 4             | 0          | 0             | 4                       | 6         | 2        |
| <b>IV</b>                                           | 1         | 0                                       | 1              | 0         | 0        | 1                                               | 0          | 0             | 0          | 0             | 1                       | 0         | 0        |
| <b>V</b>                                            | 14        | 10                                      | 2              | 2         | 0        | 0                                               | 5          | 9             | 0          | 0             | 5                       | 8         | 1        |
| <b>VI</b>                                           | 0         | 0                                       | 0              | 0         | 0        | 0                                               | 0          | 0             | 0          | 0             | 0                       | 0         | 0        |
| <b>VII</b>                                          | 1         | 0                                       | 1              | 0         | 0        | 0                                               | 0          | 1             | 0          | 0             | 1                       | 0         | 0        |
| <b>Total</b>                                        | <b>44</b> | <b>26</b>                               | <b>8</b>       | <b>9</b>  | <b>1</b> | <b>7</b>                                        | <b>19</b>  | <b>15</b>     | <b>3</b>   | <b>0</b>      | <b>21</b>               | <b>19</b> | <b>4</b> |
| <b>Strains derived from newborn (n = 36)</b>        |           |                                         |                |           |          |                                                 |            |               |            |               |                         |           |          |
| <b>Ia</b>                                           | 9         | 1                                       | 0              | 8         | 0        | 9                                               | 0          | 0             | 0          | 0             | 6                       | 3         | 0        |
| <b>Ib</b>                                           | 1         | 1                                       | 0              | 0         | 0        | 0                                               | 0          | 0             | 1          | 0             | 0                       | 1         | 0        |
| <b>II</b>                                           | 4         | 3                                       | 0              | 0         | 1        | 1                                               | 2          | 0             | 1          | 0             | 2                       | 2         | 0        |
| <b>III</b>                                          | 11        | 2                                       | 8              | 0         | 1        | 0                                               | 9          | 2             | 0          | 0             | 5                       | 6         | 0        |
| <b>IV</b>                                           | 2         | 1                                       | 1              | 0         | 0        | 1                                               | 1          | 0             | 0          | 0             | 1                       | 1         | 0        |
| <b>V</b>                                            | 9         | 7                                       | 0              | 2         | 0        | 1                                               | 4          | 4             | 0          | 0             | 2                       | 6         | 1        |
| <b>VI</b>                                           | 0         | 0                                       | 0              | 0         | 0        | 0                                               | 0          | 0             | 0          | 0             | 0                       | 0         | 0        |
| <b>VII</b>                                          | 0         | 0                                       | 0              | 0         | 0        | 0                                               | 0          | 0             | 0          | 0             | 0                       | 0         | 0        |
| <b>Total</b>                                        | <b>36</b> | <b>15</b>                               | <b>9</b>       | <b>10</b> | <b>2</b> | <b>12</b>                                       | <b>16</b>  | <b>6</b>      | <b>2</b>   | <b>0</b>      | <b>16</b>               | <b>19</b> | <b>1</b> |

\*The *alp4* gene was not found in the tested strains

Supplementary Table S3. Percentage of *Streptococcus agalactiae* strains with different biofilm forming capacity

| <b>Ability to form biofilm*</b> | <b>Isolates [n]</b> | <b>Isolates [%]</b> |
|---------------------------------|---------------------|---------------------|
| Not a biofilm producer          | 0                   | 0.0                 |
| Weak biofilm producer           | 72                  | 43.6                |
| Moderate biofilm producer       | 86                  | 52.1                |
| Strong biofilm producer         | 7                   | 4.2                 |

\*The tested strains were classified on the basis of the following criteria: not a biofilm producer:  $OD \leq OD_c$ , (all strains with OD values below 0,13); weak biofilm producer  $OD_c < OD \leq 2 \times OD_c$ , (all strains with OD values above 0,13 and below 0,26); moderate biofilm producer:  $2 \times OD_c < OD \leq 4 \times OD_c$  (all strains with OD values above 0,26 and below 0,52); strong biofilm producer:  $OD > 4 \times OD_c$  (all strains with OD values above 0,52). The mean optical density (OD) of the negative control +3 standard deviations of negative control was considered the cut-off ( $OD_c = 0,13$ ).

Supplementary Table S4. Primer sets used for identification, serotyping and detection of virulence genes in *S. agalactiae*

|                                 | Starter | Primer sequence (5'→3')       | Amplicon size (bp) | Annealing temp. (°C) | Reference |
|---------------------------------|---------|-------------------------------|--------------------|----------------------|-----------|
| <b>Identification</b>           |         |                               |                    |                      |           |
| GBS cAMP                        | F       | TTTTCAACCAGCTGTATTAGAAGTA     | 155                | 48.0                 | [60]      |
|                                 | R       | GTTCCCTGAACATTATCTTTGAT       |                    |                      |           |
| <b>Serotyping</b>               |         |                               |                    |                      |           |
| Serotyp Ia<br><i>AB028896</i>   | F       | GGTCAGACTGGATTAATGGTATGC      | 521                | 57.0                 | [65]      |
|                                 | R       | GTAGAAATAGCCTATATACGTTGAATGC  |                    |                      |           |
| Serotyp Ib<br><i>AB050723</i>   | F       | TAAACGAGAATGGAATATCACAAACC    | 770                | 57.0                 | [65]      |
|                                 | R       | GAATTAACCTCAATCCCTAAACAATATCG |                    |                      |           |
| Serotyp II<br><i>AY375362</i>   | F       | GAGAAGCCCAAGGATGGATT          | 188                | 49.2                 | DGFM      |
|                                 | R       | TCCACTATGCTTTTGTA AAAATIGG    |                    |                      |           |
| Serotyp III<br><i>AF163833</i>  | F       | CCACATATGAGAATAAGACTTGC       | 187                | 57.0                 | [60]      |
|                                 | R       | CCAACATACAGACCAATAGTATTC      |                    |                      |           |
| Serotyp IV<br><i>AF355776.1</i> | F       | TTTGCTTGTGAGCTACCTGGA         | 314                | 52.0                 | DGFM      |
|                                 | R       | TCTCCTCCCAATTTTCGTC           |                    |                      |           |
| Serotyp V<br><i>AF349539</i>    | F       | AACAGAGGCCAATCAGTTGC          | 247                | 57.0                 | DGFM      |
|                                 | R       | CTTCCAACGCCACCTCTAAA          |                    |                      |           |
| Serotyp VI<br><i>AF337958.1</i> | F       | GGACTTGAGATGGCAGAAGGT         | 523                | 54.0                 | DGFM      |
|                                 | R       | CTCGTACAACTTCGCTTCCAC         |                    |                      |           |
| Serotyp VII<br><i>AY376403</i>  | F       | GGAGAGAACAATGTCCAGATTACG      | 369                | 54.0                 | DGFM      |
|                                 | R       | AGCTGGTCGTGATTTCTACACA        |                    |                      |           |
| <b>Virulence genes</b>          |         |                               |                    |                      |           |
| PI-1<br><i>EU929540.1</i>       | F       | AACCACTAGCAGGCGTTGTCTTTG      | 298                | 60.0                 | This work |
|                                 | R       | TGAGCCCGGAAATTCTGATATGCC      |                    |                      |           |
| PI-2a<br><i>EU929374.1</i>      | F       | GCCGTTAGATGTTGTCTTCGTA CT     | 575                | 60.0                 | This work |
|                                 | R       | TTTACTGCGGTCCCAAGAGCTTC       |                    |                      |           |
| PI-2b<br><i>EU929426.1</i>      | F       | AAGTCTTGACCAAGGATACGACGC      | 314                | 60.0                 | This work |
|                                 | R       | ATCGTGTTACTTGCCCTGCGTA        |                    |                      |           |
| Universal                       | F       | TGATACTTCACAGACGAAACAACG      | -                  | 58.0                 | [22]      |
| Alpha-C                         | R       | TACATGTGGTAGTCCATCTTCACC      | 398                | 58.0                 | [22]      |
| Rib                             | R       | CATACTGAGCTTTTAAATCAGGTGA     | 295                | 58.0                 | [22]      |
| Epsilon                         | R       | CCAGATACATTTTTACTAAAGCGG      | 200                | 58.0                 | [22]      |
| Alp2/3                          | R       | CACTCGGATTACTATAATTTTAGCAC    | 334                | 58.0                 | [22]      |

DGFM - primers from a set of primers designed at the Department of Genetics and Pharmaceutical Microbiology.

The primers used in PCR reactions were designed using the Primer3 program ([www.http://bioinfo.ut.ee/primer3-0.4.0/](http://bioinfo.ut.ee/primer3-0.4.0/)) and checked for the relevant parameters using the Primer-BLAST function (Basic Local Alignment Search Tool) available from the NCBI (National Center for Biotechnology Information). The specificity of the primers was checked in the BLAST Assembled Ref Genomes program <https://blast.ncbi.nlm.nih.gov/Blast.cgi>.



To identify serotypes II, IV, VI and VII, single PCR reactions were carried out, whereas PCR multiplexes were optimized for serotypes Ia, Ib, III and V. Genes encoding various types of fimbriae (PI-1, PI-2a, PI-2b) were detected using single standard PCR reactions. In contrast, the identification of genes encoding surface proteins from the Alp family was carried out in the multiplex PCR reaction using a modified methodology described by Creti R et al. [22]. Also to identify genes encoding fibrinogen-binding proteins, a multiplex PCR reaction was used.
